# Supplementary material for: Molecular subtypes, prognostic and immunotherapeutic relevant gene signatures mediated by DNA methylation regulators in hepatocellular carcinoma
Source: publisher site journal article supplement (doi:10.18632/aging.204155), 2022-06-30
Supplement: Supplementary file [file aging-v14i12-204155-supplementary-material-SD1.pdf]

## SUPPLEMENTARY FIGURES

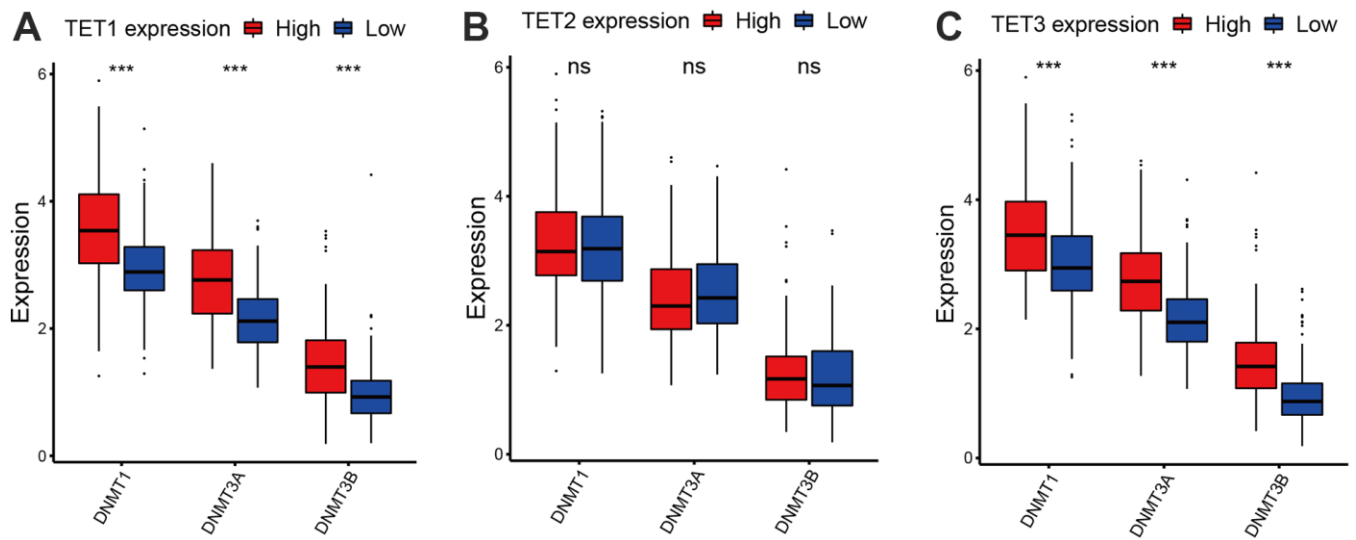

**Supplementary Figure 1. Difference in writer gene expression between low and high eraser genes. (A) TET1. (B) TET2. (C) TET3.** Data analyses were based on the TCGA-LIHC cohort.

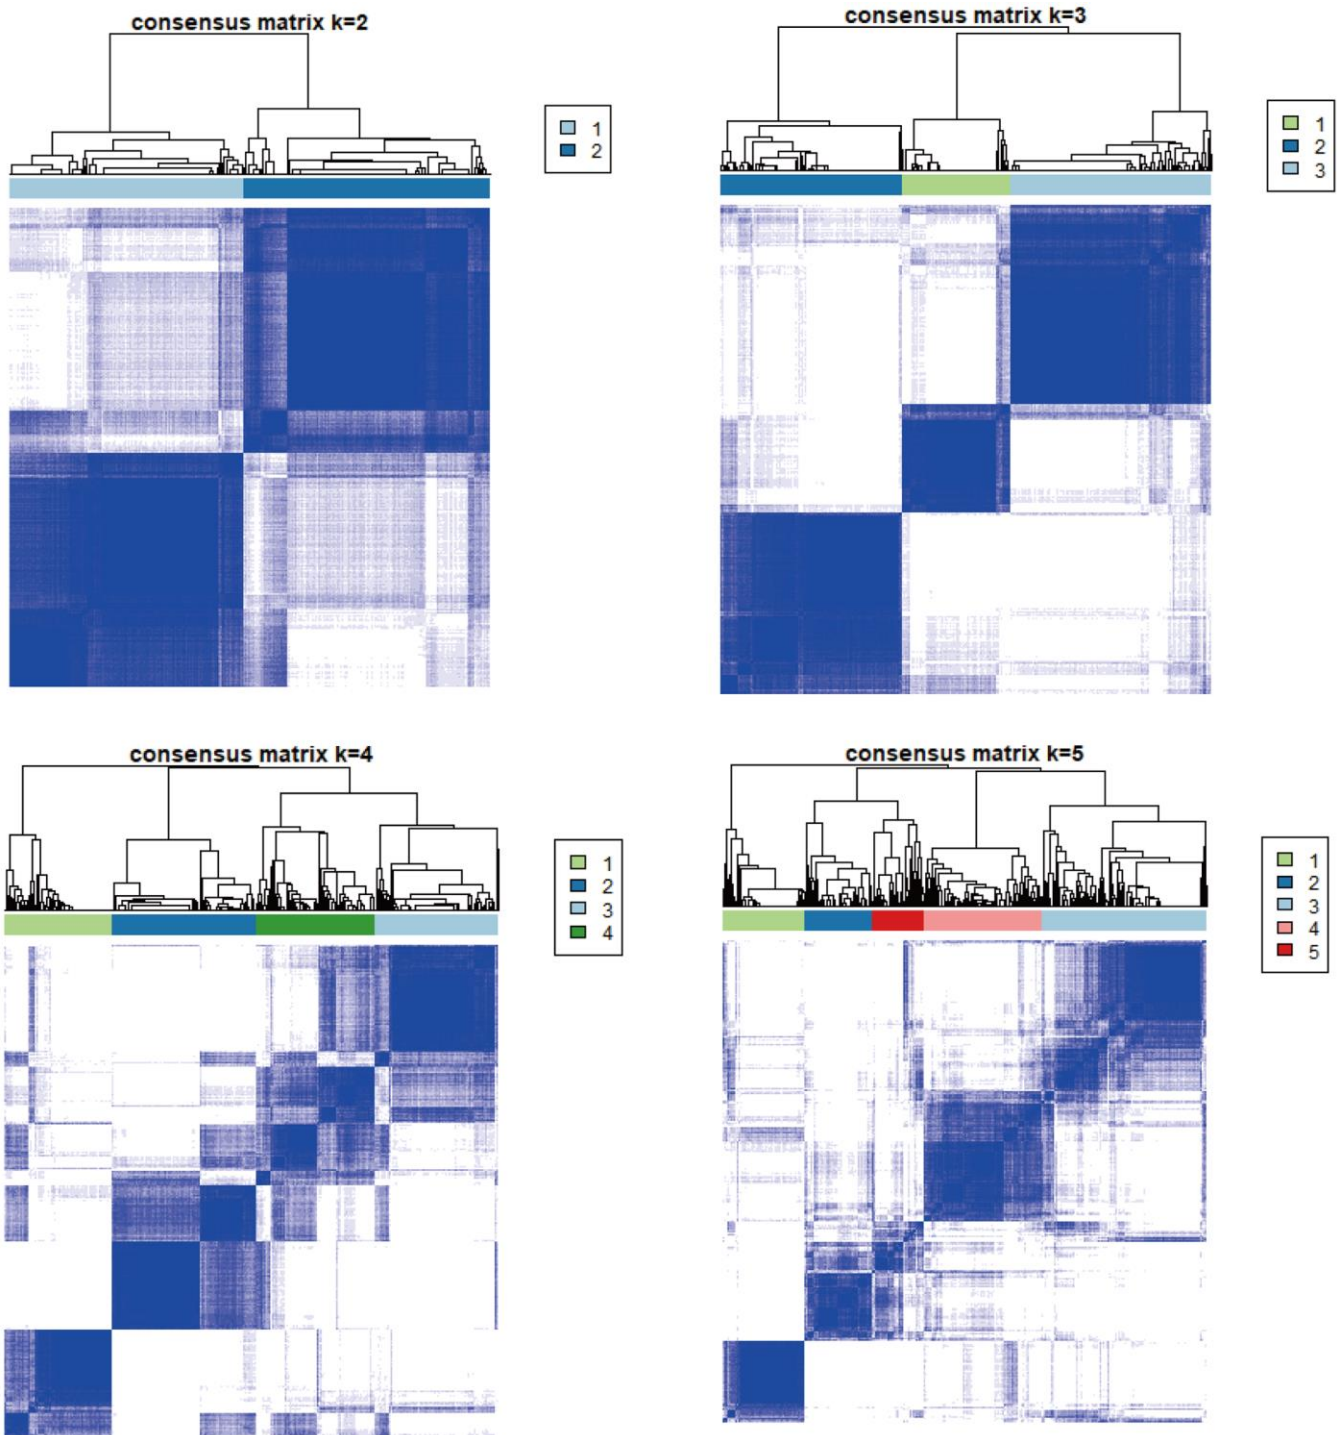

**Supplementary Figure 2. Consensus matrices of 20 DNA methylation regulators for k = 2, k=3, k=4 and k=5.** Data analyses were based on the TCGA-LIHC cohort.

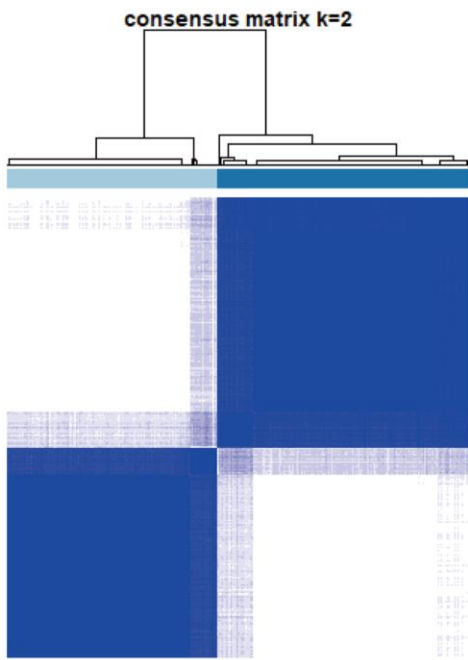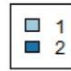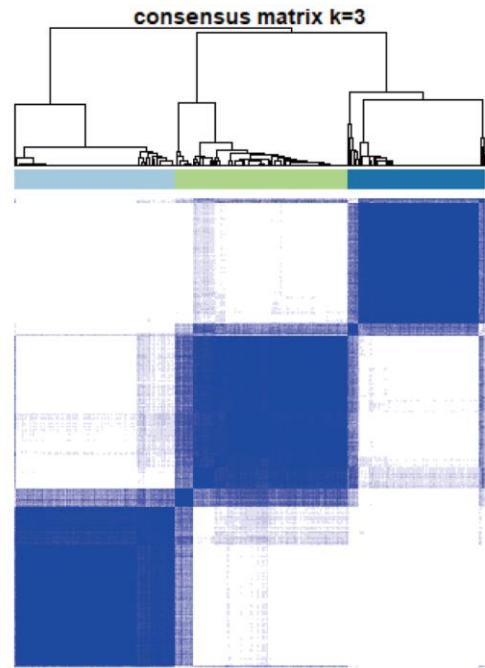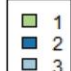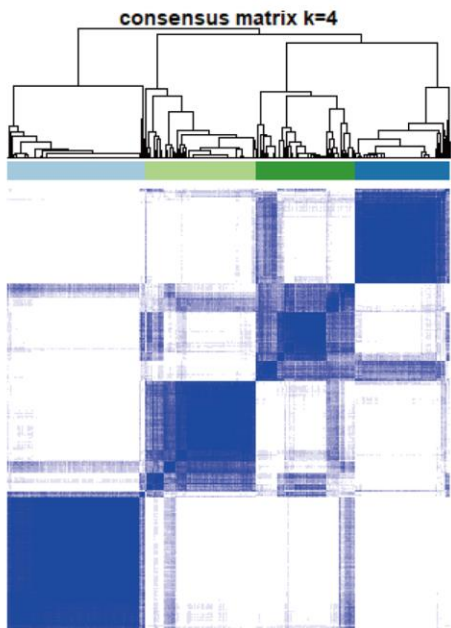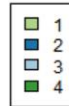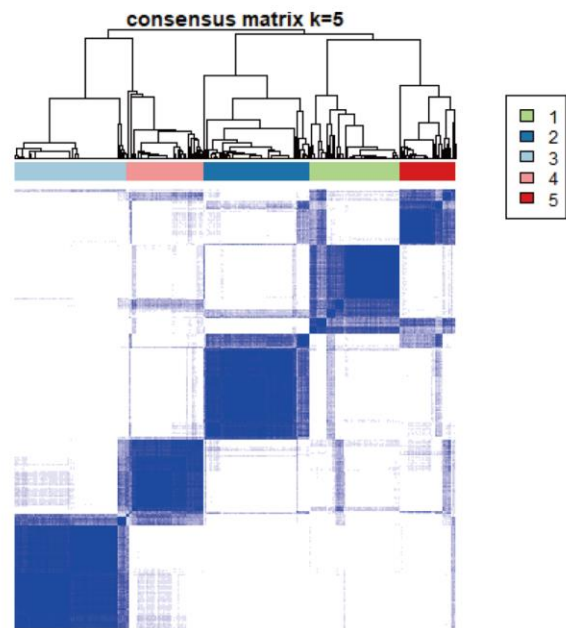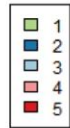

**Supplementary Figure 3. Consensus matrices of 1037 overlapping differentially expressed genes for  $k = 2$ ,  $k=3$ ,  $k=4$  and  $k=5$ . Data analyses were based on the TCGA-LIHC cohort.**

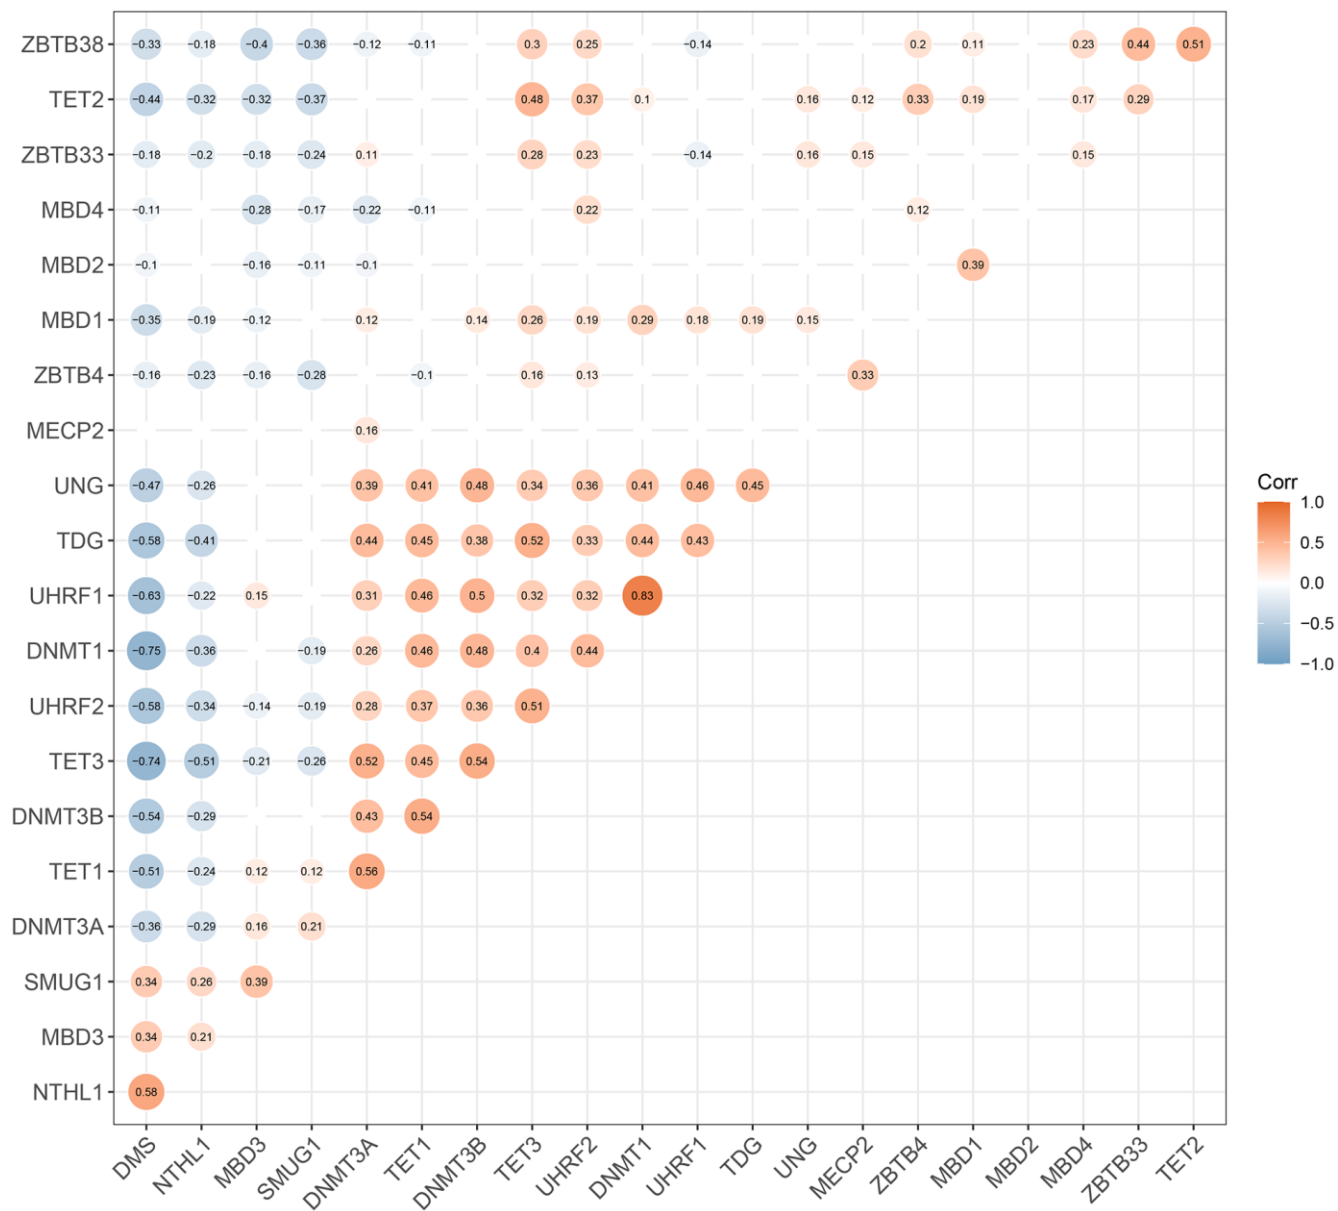

**Supplementary Figure 4. Correlation between DMS score and expression of 20 DNA methylation regulators.** The numbers in the circles represented the correlation coefficients.
