# Supplementary material for: Molecular subtypes, prognostic and immunotherapeutic relevant gene signatures mediated by DNA methylation regulators in hepatocellular carcinoma
Source: Aging (Albany NY). 2022 Jun 30;14(12):5271–91. doi: 10.18632/aging.204155 (PMC9271297; doi:10.18632/aging.204155)
Supplement: Supplementary Table 1 [file aging-14-204155-s002.xlsx]

## Sheet: aging-22-014245-s002
Supplementary Table 1. Prognostic analysis for these 1037 overlapping differentially expressed genes using the univariate Cox regression model.
Gene	HR	HR.95L	HR.95H	pvalue
KIF2C	1.50345	1.29439	1.74627	9.41e-08
CENPA	1.55101	1.31745	1.82598	1.36e-07
CDC20	1.37526	1.22099	1.54903	1.53e-07
PRR11	1.61034	1.34526	1.92766	2.08e-07
PLK1	1.47748	1.26241	1.72919	1.16e-06
NDC80	1.57566	1.30891	1.89678	1.55e-06
NCL	2.28698	1.62492	3.2188	2.1e-06
CCNB1	1.43275	1.23147	1.66694	3.23e-06
GNA14	0.546591	0.422543	0.707056	4.24e-06
SAPCD2	1.49795	1.25824	1.78332	5.58e-06
AC099850.4	1.42882	1.22418	1.66768	6.05e-06
MYBL2	1.27167	1.14545	1.4118	6.6e-06
ADH4	0.890858	0.847017	0.936968	7.17e-06
FAM72D	2.52263	1.67437	3.80063	9.65e-06
SPC25	1.52174	1.26294	1.83358	1.01e-05
BIRC5	1.33211	1.17223	1.5138	1.1e-05
ECI1	0.562729	0.434648	0.728554	1.28e-05
STMN1	1.42008	1.21165	1.66437	1.49e-05
CHEK1	1.74006	1.349	2.24449	2e-05
ZWINT	1.41107	1.20449	1.65307	2.01e-05
YWHAB	2.20011	1.53099	3.16166	2.02e-05
PTTG1	1.34014	1.17116	1.53352	2.07e-05
SKA1	1.39257	1.19489	1.62294	2.24e-05
KIFC1	1.35943	1.17799	1.56882	2.66e-05
PDE2A	0.633833	0.511473	0.785464	3.09e-05
NUP205	2.06292	1.46687	2.90117	3.15e-05
CDCA3	1.47989	1.23002	1.78051	3.27e-05
CDCA5	1.4114	1.19801	1.6628	3.79e-05
CCNF	1.61753	1.2851	2.03595	4.19e-05
UBE2C	1.28329	1.13882	1.44609	4.26e-05
CDC45	1.431	1.20416	1.70057	4.71e-05
CKS2	1.44366	1.20826	1.72493	5.28e-05
SKA3	1.45761	1.21226	1.75261	6.15e-05
CDCA4	1.6257	1.28165	2.06211	6.19e-05
STARD5	0.587646	0.45297	0.762363	6.25e-05
RRM2	1.36257	1.17069	1.5859	6.47e-05
CKAP5	1.96105	1.40665	2.73396	7.11e-05
CDT1	1.32305	1.14886	1.52365	0.000101674
E2F2	1.65936	1.28324	2.14572	0.000112663
SNRPB	1.57126	1.24884	1.97691	0.000115063
SASS6	1.83892	1.34841	2.50786	0.000118906
AL442125.2	2.50418	1.56789	3.99961	0.000121804
NRAS	1.78439	1.32498	2.40309	0.000137424
FUBP1	1.83329	1.34221	2.50403	0.000138902
ZBTB40	2.24647	1.48109	3.40738	0.000140136
ECM2	0.764667	0.665444	0.878686	0.000154496
MTFR2	1.585	1.24699	2.01461	0.000167374
CDC25A	1.43281	1.18739	1.72896	0.000175596
TROAP	1.32992	1.14512	1.54454	0.000187602
NUP85	1.88253	1.35006	2.625	0.000191954
TACC3	1.38962	1.1687	1.65229	0.000195528
NUP107	1.9692	1.37651	2.8171	0.00020804
IARS1	1.69872	1.2829	2.24931	0.000216349
CDC6	1.34368	1.14896	1.57141	0.000216957
CENPM	1.29054	1.12734	1.47736	0.000217642
UBAP2L	1.74472	1.29835	2.34454	0.000222731
MASTL	1.76007	1.30231	2.37872	0.000234405
SEC61A1	1.67274	1.27062	2.20213	0.000245231
H2AX	1.39889	1.16842	1.67483	0.000257714
CDC25B	1.39994	1.16879	1.67681	0.000258322
TAF1B	2.10281	1.40834	3.13974	0.000278927
PHF19	1.50537	1.20684	1.87774	0.000286664
QSER1	2.05124	1.38929	3.02859	0.000301759
YWHAQ	1.55954	1.22461	1.98607	0.000315083
UBE2T	1.36289	1.14994	1.61528	0.000354791
RBBP4	1.79703	1.30239	2.47952	0.000359083
HSPD1	1.64239	1.24901	2.15967	0.000382862
AC025176.1	1.791	1.29696	2.47321	0.000401566
KIF2A	1.78369	1.29453	2.45769	0.000402459
CDC25C	1.34277	1.13791	1.58452	0.000483963
BTNL9	0.720434	0.599064	0.866394	0.000494704
ACTL6A	1.66797	1.25057	2.2247	0.000498498
TOPBP1	1.70687	1.2616	2.3093	0.000526879
RFC4	1.44519	1.17257	1.7812	0.000555233
AURKB	1.27351	1.10838	1.46324	0.000644368
RIBC2	1.37369	1.14445	1.64886	0.000653696
GABARAPL1	0.774897	0.66882	0.897799	0.000685555
INCENP	1.52763	1.19539	1.9522	0.000708298
TRAIP	1.42738	1.16092	1.755	0.000737416
CCDC88A	1.63743	1.22905	2.18149	0.000754408
DCLRE1B	1.9613	1.32393	2.90553	0.000781271
CENPW	1.2993	1.11457	1.51465	0.000819226
USP1	1.6032	1.21588	2.11391	0.000821876
FEN1	1.3839	1.14355	1.67477	0.000843602
PRELID3B	1.75719	1.26136	2.44794	0.000860231
CENPH	1.47821	1.17415	1.86101	0.000879949
ADH1B	0.893736	0.836436	0.954961	0.000890065
GRB2	1.91405	1.30494	2.80748	0.000894484
CDV3	1.84588	1.28498	2.65162	0.000910791
KPNB1	1.658	1.22977	2.23534	0.000910813
LCORL	1.99925	1.32733	3.01132	0.000916666
PCLAF	1.33322	1.12437	1.58086	0.000938172
CPEB3	0.698131	0.564191	0.86387	0.000945085
PPP1R32	0.615244	0.461092	0.820932	0.000964055
ZMYM1	1.92928	1.30506	2.85207	0.000984514
U2AF2	1.92631	1.30358	2.84653	0.000999721
CCNB2	1.28799	1.10745	1.49798	0.00102208
AP000648.4	2.39254	1.41757	4.03807	0.00108838
EIF2S3	1.567	1.19623	2.0527	0.00111156
EME1	1.46116	1.16266	1.83631	0.00114388
WDR62	1.4392	1.15527	1.79291	0.00116523
CHAF1B	1.34854	1.12567	1.61554	0.00117746
SPIN4	1.57644	1.19744	2.0754	0.00117746
ZNF248	2.26259	1.37886	3.71272	0.00123215
ARL6IP6	1.64155	1.21519	2.2175	0.00123734
ASF1B	1.28236	1.10257	1.49146	0.00125129
MTFMT	0.482852	0.309138	0.754181	0.00137438
AP001528.2	0.574362	0.408116	0.808329	0.00147041
NONO	1.50699	1.16982	1.94133	0.00150436
SMC4	1.33137	1.11552	1.58899	0.00151779
HSP90AA1	1.45649	1.1527	1.84034	0.00162894
AL445423.1	0.637162	0.481013	0.844001	0.00167581
PTDSS2	1.41407	1.13881	1.75586	0.00170839
RAD51	1.38932	1.13123	1.70629	0.00171309
HNRNPR	1.82403	1.24903	2.66373	0.00186508
PKMYT1	1.34784	1.11637	1.6273	0.00190207
TUBA1B	1.32251	1.10843	1.57793	0.00191865
PRMT3	1.78403	1.23723	2.5725	0.00193579
TRPC4AP	1.99415	1.28869	3.08581	0.00194486
ARHGEF39	1.54689	1.17323	2.03955	0.00198469
MACROH2A1	1.81228	1.24257	2.64319	0.00201589
HAUS6	1.67527	1.20696	2.3253	0.00203953
AC068134.3	2.1374	1.31703	3.46878	0.00210767
BCOR	1.55658	1.17379	2.0642	0.00212171
AL590226.1	0.660117	0.505937	0.861282	0.00221132
RNASEH2A	1.3303	1.10757	1.59783	0.00226701
E2F1	1.21194	1.07083	1.37165	0.00233831
C10orf143	0.505233	0.325436	0.784364	0.00234831
IQCB1	1.73619	1.21631	2.47827	0.0023777
CDK2	1.4757	1.14749	1.8978	0.00243055
FAM136A	1.62565	1.1848	2.23054	0.00260734
BORA	1.75614	1.21661	2.53494	0.00263916
NEDD1	1.681	1.19707	2.36058	0.00271431
PIF1	1.44825	1.13684	1.84495	0.00271526
MCM5	1.37931	1.11763	1.70227	0.00273541
CCDC93	1.78636	1.22132	2.61283	0.00278526
CDKN3	1.24101	1.0772	1.42972	0.00279334
TTF2	1.69555	1.1983	2.39914	0.00286853
CORO1C	1.54663	1.16043	2.06135	0.00292928
RFWD3	1.74124	1.20788	2.51012	0.00295745
MCM3AP-AS1	3.33926	1.50729	7.39781	0.00296847
ESR1	0.7201	0.579636	0.894602	0.00301725
ZNF765	2.34542	1.33365	4.12477	0.00308096
AC093797.1	0.583078	0.407825	0.833641	0.00310095
CALU	1.40497	1.12096	1.76096	0.00316837
RHOA	1.71936	1.19881	2.46595	0.0032248
MIS18BP1	1.64153	1.18029	2.283	0.00323074
BRPF1	2.13735	1.2815	3.56478	0.00361059
UBALD1	0.666628	0.50633	0.877674	0.00385532
TK1	1.23754	1.07041	1.43077	0.00398709
DNMT1	1.38208	1.10864	1.72297	0.00401659
ZC3H13	0.717965	0.572582	0.900261	0.00410324
LYRM9	0.647825	0.481413	0.871763	0.00415767
TFDP1	1.35623	1.10029	1.6717	0.00429411
NEMP1	1.42578	1.11529	1.82273	0.00464496
AC011374.2	0.748359	0.612178	0.914833	0.00467591
RMI2	1.24012	1.06755	1.4406	0.00487952
TYMS	1.23782	1.06692	1.43609	0.00488557
KCTD7	1.80653	1.19484	2.73136	0.00504797
LRCH1	0.66787	0.503223	0.886387	0.0051894
GALNT15	0.712511	0.560968	0.904994	0.00546673
AL354920.1	0.712363	0.56072	0.905018	0.00548389
FAM167B	0.769472	0.639401	0.926002	0.00554249
THOC2	1.64374	1.1554	2.33848	0.00572599
CAPZA1	1.56993	1.13929	2.16336	0.0058315
GTF2H3	1.64582	1.15128	2.35279	0.00628367
ODF3B	0.758036	0.621293	0.924877	0.00634502
AQP9	0.917293	0.862056	0.976069	0.00644286
CDC37L1-DT	0.740032	0.595327	0.919909	0.00668881
PPP1R14A	0.784455	0.658209	0.934913	0.0066934
TMEM134	0.6333	0.454948	0.881571	0.00679175
EEF1A1	1.33038	1.08021	1.6385	0.00723417
SMARCC1	1.56257	1.12692	2.16665	0.00743976
SRD5A2	0.870298	0.785974	0.963668	0.00754636
ZNF611	1.545	1.12282	2.12594	0.00755639
TK2	0.676586	0.507426	0.902138	0.00777818
NDE1	1.60623	1.1326	2.27793	0.00784977
CDK5R1	1.58343	1.12833	2.22209	0.00785287
CKLF	1.33272	1.07809	1.64749	0.00793087
HMOX2	0.707147	0.547013	0.914157	0.00816732
CCAR1	1.69016	1.14538	2.49406	0.00820001
FANCG	1.39805	1.09018	1.79286	0.00828342
HINT2	0.742729	0.59547	0.926404	0.00833994
CYP8B1	0.929281	0.879905	0.981428	0.00846476
HNRNPU	1.63049	1.13273	2.34698	0.00852438
FIGNL1	1.44429	1.09814	1.89954	0.00854804
RPLP0	1.34181	1.07747	1.671	0.00862564
RAB11B-AS1	0.804014	0.68284	0.946691	0.00886415
JMJD6	1.44631	1.09634	1.908	0.00903731
MRPL17	1.49255	1.10445	2.01703	0.00914483
MIR621	0.903043	0.836364	0.975037	0.00916294
XAF1	0.756244	0.612886	0.933134	0.00917921
MRPL46	0.712633	0.55182	0.92031	0.00942054
PAPSS1	1.42961	1.09082	1.87362	0.00960073
HCFC1	1.64638	1.12593	2.4074	0.0101185
CDC27	1.67083	1.12933	2.47199	0.010213
HNRNPA2B1	1.58349	1.11443	2.25	0.0103347
DVL3	1.49342	1.09861	2.0301	0.0104568
RBM12	1.72158	1.13518	2.61089	0.0105678
XPO1	1.65508	1.12212	2.44117	0.011052
VEZF1	1.56124	1.10707	2.20172	0.0110879
TTI1	1.73831	1.13397	2.66473	0.0111869
CCDC159	0.703504	0.535614	0.924018	0.011471
SRSF10	2.01535	1.17015	3.47102	0.0115219
TRPM7	0.727084	0.567663	0.931276	0.0116106
HROB	1.33301	1.06456	1.66915	0.0122356
CREB1	1.95214	1.1561	3.29631	0.0123273
DHX9	1.48519	1.08923	2.02508	0.012411
CEP135	1.9809	1.15771	3.38941	0.012618
AC022335.1	0.561149	0.355023	0.886952	0.0133775
COQ4	0.695049	0.520409	0.928295	0.013742
SLF1	1.87844	1.1346	3.10993	0.0142501
POLR2H	1.43586	1.07494	1.91795	0.0143161
PTBP1	1.69355	1.11059	2.58252	0.014397
AC116407.1	0.578008	0.37232	0.897328	0.0145773
ACLY	1.36629	1.06211	1.75759	0.0151423
NDOR1	1.48507	1.07927	2.04345	0.0151654
AC020763.1	0.655636	0.466165	0.922117	0.0152698
NIT2	0.676262	0.492337	0.928896	0.0157177
RILP	0.784055	0.643454	0.955379	0.0158366
KIF20B	1.45537	1.07254	1.97485	0.0159682
ZNF124	1.51233	1.08025	2.11724	0.0159694
HADH	0.781975	0.63997	0.955492	0.0161616
SEPTIN2	1.334	1.05453	1.68753	0.0162786
ZNF408	1.51583	1.07918	2.12914	0.0164143
SENP1	1.78245	1.11162	2.8581	0.0164311
ABCA8	0.857414	0.755918	0.972539	0.0167046
DSN1	1.33816	1.05413	1.69874	0.0167116
DNA2	1.43767	1.06777	1.93571	0.0167564
NCAPD3	1.50698	1.07657	2.10946	0.0168518
FYTTD1P1	0.817814	0.693002	0.965105	0.0172965
HNRNPK	1.55379	1.07951	2.23646	0.0177077
AC012676.1	1.43707	1.06434	1.94032	0.0179332
WDR45B	1.46006	1.06487	2.00192	0.0187607
CYP3A4	0.944908	0.901289	0.990638	0.0187704
WDR6	1.3952	1.05677	1.84202	0.018799
MIR99AHG	0.735035	0.568326	0.950645	0.0189948
AC104785.1	0.76449	0.610729	0.956962	0.0190818
ZNHIT1	0.754302	0.595503	0.955447	0.0193949
MTHFD1	0.843401	0.730984	0.973106	0.0196228
RBM12B	1.62588	1.08029	2.44701	0.0197957
SPAG5	1.2168	1.03131	1.43566	0.0200554
AL031727.1	1.27731	1.03854	1.57097	0.0204399
TOP2B	1.48631	1.06174	2.08064	0.0209408
PGM5	0.771769	0.619211	0.961912	0.0211362
AC135050.5	0.70094	0.517553	0.949307	0.0216682
HERC3	0.737591	0.568545	0.956901	0.0219248
OPA1	0.65825	0.459473	0.943022	0.0226196
TCERG1	1.54127	1.06073	2.23952	0.0232544
ETFBKMT	0.667949	0.471183	0.946884	0.0234203
SF3A2	1.3503	1.04106	1.75141	0.0236233
C14orf28	0.647389	0.444212	0.943497	0.0236587
TXNL4A	1.38504	1.04426	1.83704	0.0237903
CCS	0.761468	0.601144	0.964552	0.0238722
ZNF736	1.5605	1.06066	2.29588	0.0238899
SOCS7	1.42891	1.04799	1.94828	0.0240519
MRE11	1.70621	1.07252	2.71429	0.0240991
SYNE2	0.739747	0.568777	0.962109	0.0245742
ECSCR	0.785774	0.636571	0.969946	0.0248333
LINC02716	0.859412	0.752876	0.981023	0.0248523
RNF44	1.37695	1.04111	1.82113	0.024938
ST3GAL6	0.836847	0.716003	0.978086	0.0251931
RN7SKP70	0.654149	0.450801	0.949224	0.025464
NRM	1.19815	1.02238	1.40414	0.0255202
AC138356.1	0.68779	0.494009	0.957585	0.0266468
BTBD3	1.31687	1.03214	1.68015	0.0267985
PRR7	1.21461	1.02154	1.44416	0.027715
HMGXB4	1.49833	1.04528	2.14774	0.027734
SMC2	1.33133	1.03121	1.7188	0.0281105
RAD21	1.31774	1.02975	1.68626	0.0283069
SLC1A2	0.900219	0.819489	0.988901	0.0283234
VRK1	1.36781	1.03312	1.81094	0.0287048
AOX1	0.922987	0.858798	0.991973	0.0293247
EFCC1	0.669753	0.466985	0.960563	0.0293579
CD320	1.26275	1.02272	1.5591	0.0300954
SNRPEP2	1.31636	1.02616	1.68862	0.0305234
DCAF7	1.42369	1.03323	1.96171	0.0307855
AC245297.4	1.24851	1.02075	1.5271	0.0307895
LINC02259	0.6576	0.449497	0.962048	0.0308287
HPS3	1.30353	1.0247	1.65822	0.0308746
HNRNPF	1.40367	1.03167	1.9098	0.0308961
C11orf98	1.42064	1.03235	1.955	0.0311318
AC018638.8	0.807462	0.664669	0.980931	0.0312506
NAA50	1.554	1.04036	2.32122	0.0312992
ABCB4	0.903278	0.823365	0.990946	0.0313645
EPB41L2	1.27559	1.02142	1.593	0.0318
TACO1	0.73536	0.555374	0.973676	0.0318555
HNRNPH1	1.34774	1.02528	1.77163	0.032447
DNAJC30	0.74502	0.568603	0.976172	0.0327705
PPP6R1	1.40927	1.02821	1.93154	0.0329301
HNRNPC	1.59831	1.0385	2.45989	0.0330323
RUVBL2	1.43376	1.02883	1.99806	0.0333516
STK4	1.59006	1.0354	2.44183	0.0340969
NME1	1.23896	1.01572	1.51128	0.0345327
GIHCG	1.23265	1.0151	1.49683	0.0347555
PPP1R14BP3	1.22423	1.01436	1.47751	0.0349836
DHRS4L2	0.79947	0.649213	0.984503	0.0351178
UBR1	0.671746	0.46387	0.972778	0.0351996
CES5A	0.817607	0.677877	0.986138	0.0352094
AL132639.2	0.616124	0.392349	0.967529	0.0354375
ZNF107	1.43071	1.02417	1.99864	0.0357313
ADNP	1.44047	1.02018	2.03391	0.0381297
SECISBP2L	0.754074	0.577405	0.984799	0.0382256
MFSD14B	1.3626	1.01561	1.82814	0.0390866
CAND1	1.53527	1.02158	2.30724	0.039141
ZBTB26	1.52892	1.02	2.29176	0.0397975
ZNF532	1.31281	1.0127	1.70187	0.0398554
DARS2	1.30438	1.01232	1.6807	0.0399115
HSPA5	1.28696	1.00829	1.64264	0.042734
PLPP3	0.854146	0.732705	0.995715	0.043921
ISY1	1.35798	1.00827	1.82897	0.0439908
PTPN23	1.47928	1.00859	2.16964	0.0451008
VHL	1.3339	1.00504	1.77037	0.0460679
HRAS	1.24725	1.00356	1.55012	0.046372
MELTF-AS1	1.20728	1.00266	1.45367	0.0468134
RPS14	1.32947	1.00337	1.76156	0.0473265
AC073842.2	1.43466	1.00419	2.04965	0.0473724
UBBP4	0.770161	0.594279	0.998097	0.0483407
CEP162	1.59212	1.00266	2.52812	0.0486969
NUP160	1.40902	1.00183	1.98173	0.048787
AL031775.1	0.745991	0.556887	0.999309	0.049461
GORAB	1.25216	0.99967	1.56842	0.0503363
DPM2	1.26616	0.999359	1.60419	0.0506236
SUZ12P1	1.39174	0.998098	1.94062	0.0513262
LINC01588	0.705175	0.495959	1.00265	0.0517453
SRPK1	1.34062	0.99708	1.80252	0.0523061
MAPKAPK5-AS1	1.28691	0.997391	1.66046	0.0523952
METTL1	1.28481	0.997268	1.65526	0.0525261
MIR4292	1.19446	0.998047	1.42952	0.0525463
NCOA6	1.44477	0.994771	2.09833	0.0533066
NUDT8	0.833649	0.692617	1.0034	0.0543431
PSMG3	1.2349	0.996025	1.53107	0.0543987
SHPK	0.784214	0.611842	1.00515	0.0549329
DNAJC9	1.3122	0.993245	1.73359	0.0558422
LSM14B	1.37039	0.992069	1.89299	0.0559204
AC018521.5	0.784665	0.61189	1.00622	0.0559968
UTP20	1.46622	0.98953	2.17254	0.0564554
SP4	1.44041	0.990005	2.09572	0.0564615
OTUD3	1.52863	0.986575	2.36852	0.0575027
FAN1	0.771596	0.590281	1.0086	0.0577909
SEC61G	1.26438	0.991676	1.61209	0.0584201
LINC02768	0.873888	0.759937	1.00492	0.0586172
CARF	0.605572	0.359863	1.01905	0.0589038
LYST	0.706106	0.492072	1.01324	0.058946
BRMS1	1.3055	0.989875	1.72175	0.0590403
UQCRQ	0.790673	0.619443	1.00923	0.0592752
CD2AP	1.31648	0.987586	1.75492	0.0608214
AL355388.1	1.61339	0.978465	2.66033	0.0608417
PTGR2	0.751851	0.557474	1.014	0.061645
BLOC1S4	1.34108	0.985407	1.82513	0.0619753
AC116533.1	1.15464	0.992518	1.34325	0.0625081
DDX19B	0.737745	0.53533	1.01669	0.0630578
MEX3C	1.35964	0.983262	1.88009	0.0631853
SUPT16H	1.4488	0.978997	2.14406	0.0637643
ZNF346	1.50188	0.976505	2.30992	0.0640661
SMPD4	1.46152	0.977655	2.18487	0.0643418
U2SURP	1.4078	0.97827	2.02594	0.0655235
RARA-AS1	0.770429	0.583553	1.01715	0.0657671
AC024909.1	0.457853	0.19877	1.05463	0.0665036
MRPL40	0.755773	0.560398	1.01926	0.0665156
ARMC5	0.829569	0.679246	1.01316	0.0669838
AC024293.1	1.15454	0.98975	1.34676	0.067423
HSPB1P1	1.12839	0.991336	1.2844	0.067511
HLTF	1.26797	0.982943	1.63564	0.0676197
Z93930.2	0.802761	0.634128	1.01624	0.0678393
AC090114.3	0.717828	0.502752	1.02491	0.068071
KDM5C	1.33951	0.977764	1.8351	0.0687653
CCDC167	1.22791	0.983675	1.53278	0.0696014
CDKN2AIPNL	1.2621	0.98139	1.62309	0.0697386
GOLGB1	0.67476	0.44103	1.03236	0.0698033
AP003065.1	0.774069	0.585681	1.02305	0.0718943
CENPC	0.689963	0.460516	1.03373	0.0719952
ACSF3	0.778795	0.59292	1.02294	0.0723443
TAF4	1.45871	0.964957	2.2051	0.0733303
RAB2B	0.729869	0.516856	1.03067	0.0737123
GTF2IP9	0.70014	0.473197	1.03593	0.074523
NEK9	0.703476	0.4778	1.03574	0.0747452
ATXN2L	1.3212	0.972393	1.79512	0.0749181
SNRNP200	1.32792	0.971896	1.81436	0.07492
HNRNPUL1	1.35155	0.969862	1.88345	0.0752023
SPG11	0.754728	0.552982	1.03008	0.0761904
C6orf226	0.805352	0.633862	1.02324	0.0764064
AC132008.2	1.33829	0.969468	1.84744	0.0764842
MECR	0.752958	0.549859	1.03108	0.076868
PTBP3	1.31567	0.970101	1.78433	0.077613
PCYOX1	0.82088	0.658971	1.02257	0.0782636
HMGN1P36	1.37536	0.963945	1.96236	0.0788367
ARSD	0.845412	0.700902	1.01972	0.0791205
SULT1A1	0.8843	0.770804	1.01451	0.0793546
LINC00963	0.792769	0.611568	1.02766	0.0794482
AC099677.1	0.89233	0.785477	1.01372	0.0800208
BAZ2A	1.32843	0.965313	1.82813	0.0812875
DEK	1.20873	0.976471	1.49623	0.0816389
HLX	0.819598	0.655116	1.02538	0.0817372
CPT2	0.839905	0.689814	1.02265	0.0823978
AC025917.1	0.674729	0.431453	1.05518	0.084609
DBR1	1.44309	0.949079	2.19424	0.0862499
ZBED4	1.31911	0.960205	1.81216	0.0873888
SINHCAF	1.18538	0.975318	1.44069	0.0874796
MRM3	0.815369	0.645159	1.03049	0.0875269
ATP2B1	1.24081	0.968641	1.58947	0.0876759
RBMX2	1.31505	0.959689	1.80199	0.0883876
CLDN2	0.937836	0.871041	1.00975	0.088664
UTP14C	0.803371	0.623762	1.0347	0.0899277
ETFA	0.780697	0.58569	1.04063	0.0913446
SF1	1.5429	0.932446	2.55301	0.091459
ZNF366	0.686702	0.443779	1.0626	0.0915312
ANKFY1	0.773051	0.572858	1.0432	0.0923039
THSD1	0.844936	0.693733	1.02909	0.0939565
ZRANB1	0.849678	0.702188	1.02815	0.0940092
SUZ12	1.29432	0.956937	1.75066	0.0940724
TMEM198B	0.811811	0.635755	1.03662	0.0946034
EP400	1.46214	0.936032	2.28394	0.0950254
NAT2	0.92657	0.8472	1.01338	0.0950883
PROX1	0.884077	0.764555	1.02228	0.0963962
TNFRSF4	1.17225	0.971739	1.41414	0.0968248
TNS3	0.838755	0.680688	1.03353	0.0988545
HACD2	1.18109	0.969102	1.43944	0.0991462
ZNRF1	0.781431	0.58256	1.04819	0.0997896
SMC1A	1.23121	0.960837	1.57767	0.100141
SEPTIN10	1.23311	0.959865	1.58415	0.101115
ZNF292	1.27114	0.953725	1.6942	0.101686
CASC4	0.818196	0.643224	1.04077	0.102158
MORC3	0.803165	0.617085	1.04536	0.103084
ILKAP	1.34948	0.939339	1.93871	0.104927
AC138956.2	0.79258	0.598299	1.04995	0.105181
ZNF581	1.19438	0.962168	1.48263	0.107325
MIS18A	1.23557	0.955033	1.5985	0.107438
C16orf95	0.740742	0.51389	1.06773	0.107692
COPRS	1.26406	0.94979	1.68232	0.108111
MAP3K7	1.37968	0.930393	2.04592	0.109364
RMDN2	0.808698	0.623291	1.04926	0.110024
ZBTB34	1.36446	0.931744	1.99815	0.110329
ZNF32-AS2	1.43478	0.920768	2.23575	0.110664
ADORA2BP1	0.910057	0.810429	1.02193	0.11111
SIRT6	1.26343	0.947293	1.68506	0.11151
SYNCRIP	1.38954	0.925752	2.08569	0.112368
ATN1	1.23261	0.952023	1.5959	0.112536
NUDT6	0.804448	0.6144	1.05328	0.113547
ZNF688	0.800971	0.608443	1.05442	0.11361
AC108010.1	0.807701	0.619055	1.05383	0.115579
TGFBR2	0.856519	0.705444	1.03995	0.117741
MZT2B	1.18442	0.957671	1.46485	0.118512
TOM1L1	0.856341	0.704679	1.04065	0.118909
LINC01909	0.862015	0.714935	1.03935	0.119805
ARMC7	1.24154	0.945278	1.63066	0.119853
HS6ST1P1	0.785028	0.578586	1.06513	0.120025
UBXN10	0.909227	0.806197	1.02542	0.120948
SURF1	0.789392	0.584757	1.06564	0.122418
CCNYL1	1.28226	0.935215	1.75809	0.122585
ELF3-AS1	1.13934	0.965168	1.34495	0.123284
AP2S1	1.27554	0.934923	1.74025	0.124681
AC133552.5	0.888707	0.764376	1.03326	0.124921
WDYHV1	1.19085	0.952694	1.48854	0.124962
AC010894.2	0.840184	0.672375	1.04987	0.125566
MAML1	1.38222	0.913354	2.09177	0.125713
ZNF23	0.413869	0.133707	1.28107	0.12594
MRPL11	1.26998	0.935081	1.72483	0.125964
TUG1	1.2603	0.935016	1.69875	0.128802
GSTO1	0.848636	0.686597	1.04892	0.128966
STOML1	0.785099	0.574468	1.07296	0.128988
ZNF169	1.90078	0.829129	4.35754	0.129192
TRAPPC11	0.788433	0.579638	1.07244	0.129922
SHB	0.844502	0.678402	1.05127	0.130404
MAZ	1.1964	0.947732	1.51031	0.131456
KHSRP	1.27357	0.929376	1.74524	0.132493
C18orf21	1.31106	0.921204	1.86589	0.132545
MAP3K2	0.74377	0.505354	1.09467	0.133289
SNORD116-4	1.17972	0.949964	1.46504	0.134784
ACTN4	1.21809	0.940305	1.57794	0.135206
TXNRD2	0.847998	0.682837	1.05311	0.135756
TM9SF4	1.3244	0.914844	1.9173	0.136632
ATXN7L3	1.27035	0.924995	1.74465	0.139326
UBE2D4	0.793555	0.58377	1.07873	0.139897
AC011290.2	1.42274	0.88813	2.27917	0.142508
PRPF38B	1.28258	0.918649	1.7907	0.14384
DHX15	1.31715	0.910143	1.90618	0.144095
SART3	1.3981	0.891592	2.19237	0.14428
AC098487.1	0.846041	0.675743	1.05926	0.144853
RBL2	0.886577	0.753815	1.04272	0.145799
RANBP6	0.816605	0.621478	1.073	0.14588
PUF60	1.21499	0.934425	1.57979	0.146039
PRRC2C	1.22365	0.931076	1.60816	0.147692
LINC00467	0.827811	0.64091	1.06922	0.147794
NDUFS7	0.82605	0.637096	1.07105	0.149291
RNF6	0.787144	0.568518	1.08984	0.149381
SOWAHB	0.895602	0.770904	1.04047	0.149485
VSTM4	0.890818	0.760938	1.04287	0.150457
MRPS18C	0.77207	0.542372	1.09905	0.151068
SEC22B	0.78872	0.570281	1.09083	0.151426
NID1	1.12492	0.957253	1.32195	0.152879
SHARPIN	1.19459	0.935524	1.5254	0.153985
EIF3F	1.29795	0.906567	1.8583	0.154372
MAT2A	1.15083	0.948263	1.39668	0.154974
CHTF18	1.18862	0.936272	1.50898	0.155856
MYO5C	0.818258	0.61933	1.08108	0.158133
HSD11B1	0.95991	0.906873	1.01605	0.158254
FIS1	0.809168	0.60257	1.0866	0.159194
AC073896.4	1.143	0.948849	1.37688	0.159374
SMC3	1.17836	0.936307	1.48298	0.16182
TMEM219	0.819468	0.619887	1.08331	0.162092
HAUS2	1.39273	0.874918	2.21702	0.162532
IDH1	1.17404	0.937287	1.47059	0.162616
GOLGA5	0.800838	0.586237	1.094	0.162868
GTF3C4	1.3659	0.881313	2.11692	0.163076
AC008014.1	0.814872	0.611008	1.08676	0.163432
CYB5D1	0.673347	0.385994	1.17462	0.1636
USP37	1.31717	0.893823	1.94103	0.163754
HBP1	0.852001	0.680037	1.06745	0.163774
SIL1	0.824729	0.628726	1.08184	0.163975
MDM1	1.356	0.882305	2.08403	0.164864
PJA2	0.84933	0.673437	1.07116	0.167793
SP3	1.26185	0.906382	1.75673	0.168294
TIGD5	1.17249	0.934358	1.47132	0.169501
ETFB	0.874675	0.72251	1.05889	0.169695
IL1R1	0.882238	0.737565	1.05529	0.17035
TWF2	1.14331	0.942805	1.38645	0.173415
TPR	1.21262	0.917895	1.60199	0.174798
POLD4	0.829909	0.633896	1.08653	0.17502
ATOX1	0.873045	0.717217	1.06273	0.175912
TIMP3	0.853547	0.678321	1.07404	0.176785
ZNF41	0.764886	0.517966	1.12951	0.177777
AL731577.2	0.82031	0.614815	1.09449	0.178212
ACIN1	1.34167	0.873723	2.06024	0.179241
AL139353.1	0.587133	0.269921	1.27713	0.179265
DHX38	1.30207	0.885719	1.91414	0.179381
OSBPL11	0.844488	0.659712	1.08102	0.17972
NARF	1.18421	0.924914	1.51621	0.179945
GON4L	1.30279	0.882766	1.92267	0.182852
CASP8AP2	1.25555	0.897136	1.75716	0.184504
IZUMO4	0.860197	0.68864	1.07449	0.184543
RAVER1	1.17721	0.924778	1.49854	0.185207
AC005034.6	0.811274	0.595313	1.10558	0.185372
NADK2-AS1	0.852779	0.67372	1.07943	0.185381
WDR24	0.829255	0.628512	1.09411	0.185522
C16orf86	0.8535	0.675082	1.07907	0.185524
SACM1L	0.74028	0.474276	1.15548	0.185564
MED31	0.802558	0.579484	1.1115	0.185589
ZCWPW1	0.851624	0.669959	1.08255	0.189514
AL391121.1	0.8315	0.630486	1.0966	0.19126
GNG12-AS1	0.663552	0.357534	1.23149	0.193608
IFT43	0.828053	0.622301	1.10183	0.195464
MYO18A	0.887069	0.739672	1.06384	0.196181
LRRC27	0.724782	0.444623	1.18147	0.196674
UGT1A4	0.957054	0.895215	1.02316	0.197747
VPS50	1.33374	0.859099	2.0706	0.199409
ZDHHC20	1.19312	0.910635	1.56324	0.200234
VRK3	0.799479	0.567641	1.12601	0.200271
WDR45	0.797175	0.56333	1.12809	0.200689
ARL16	1.17736	0.916656	1.51221	0.201063
SLC12A6	0.777104	0.527185	1.1455	0.202734
GEMIN7	1.17641	0.916132	1.51064	0.202871
PCSK7	0.747297	0.477077	1.17057	0.203319
DDX28	0.831902	0.626406	1.10481	0.20359
AHCYL2	0.814397	0.592957	1.11853	0.204769
AC027682.6	0.909231	0.784619	1.05363	0.205776
TCF15	0.838536	0.638055	1.10201	0.206521
AC008267.2	0.737271	0.459165	1.18382	0.207113
IFI27L2	1.08946	0.95327	1.2451	0.208554
ITIH4	0.910449	0.786178	1.05436	0.210214
CWC22	1.30596	0.860094	1.98295	0.210319
GLYR1	0.825368	0.610954	1.11503	0.21111
ZNF580	1.13956	0.927195	1.40057	0.214392
C1orf122	1.14382	0.92514	1.4142	0.214518
CEP295	1.32728	0.847924	2.07763	0.215562
RALGAPA1P1	0.571472	0.235724	1.38543	0.215564
GLRX2	1.17791	0.908883	1.52657	0.215805
PROSER1	1.26012	0.872623	1.8197	0.217491
ZSCAN16-AS1	0.894852	0.749556	1.06831	0.219081
KLHL24	0.839439	0.634363	1.11081	0.22071
NFYA	1.1775	0.906487	1.52953	0.220839
AL021707.3	0.807285	0.57277	1.13782	0.221481
ASAP2	1.15883	0.914744	1.46805	0.221882
SNAP23	0.756746	0.483857	1.18354	0.2219
PRPF31	1.2186	0.886808	1.67453	0.222776
AC002398.1	1.16371	0.911662	1.48544	0.223469
SBF1	1.17423	0.905768	1.52227	0.225249
HIPK3	0.819206	0.593382	1.13097	0.225524
TUT4	1.19563	0.895128	1.597	0.226357
AC106037.2	1.24098	0.874601	1.76085	0.226504
ABCG2	0.929045	0.824483	1.04687	0.226997
NRIP1	0.879877	0.714394	1.08369	0.228642
ROGDI	0.862539	0.677791	1.09765	0.229208
RALGAPB	1.32223	0.838155	2.08588	0.22979
C2CD5	1.22221	0.88028	1.69697	0.230757
AP003419.3	1.14505	0.917296	1.42936	0.231282
PXN-AS1	1.17069	0.903919	1.5162	0.232327
LRIG3	1.12924	0.924771	1.37891	0.233034
ZNF37BP	1.28746	0.849384	1.95148	0.233775
SH3BP1	1.12745	0.922604	1.37779	0.240966
SDAD1	1.16765	0.900413	1.5142	0.242461
ENDOV	0.838344	0.622019	1.1299	0.24689
MYCBP2	0.832324	0.609531	1.13655	0.248222
TMEM255B	0.802247	0.551107	1.16783	0.250094
RPS26	0.865184	0.675767	1.10769	0.250694
AC010969.2	1.18098	0.887829	1.57094	0.253169
ANXA7	0.838128	0.61866	1.13545	0.254317
CSNK2B	1.16165	0.897764	1.50309	0.254425
QRICH1	1.36507	0.798949	2.33233	0.254834
IKZF5	0.835356	0.612779	1.13878	0.255149
PRRC2A	1.16073	0.897796	1.50067	0.255408
CCM2	0.841948	0.624867	1.13444	0.258132
AC108134.4	0.847283	0.63558	1.1295	0.258573
AC130343.2	0.841543	0.621867	1.13882	0.263676
AL450326.1	0.876246	0.695032	1.10471	0.263752
NDUFS6	1.14829	0.90095	1.46354	0.263899
CDC14A	1.17984	0.881536	1.57908	0.266108
CNPY2	1.1695	0.887448	1.54118	0.266156
UHRF2	1.25892	0.838491	1.89017	0.266806
UTRN	1.14172	0.903552	1.44265	0.266871
DIP2B	1.21366	0.860866	1.71104	0.269149
AC245100.8	1.11688	0.917996	1.35886	0.269243
NDUFAB1	0.848503	0.633628	1.13625	0.27018
HECTD2	1.26199	0.832728	1.91252	0.272645
CYP1A2	0.965475	0.906353	1.02845	0.275805
SUCLA2	0.847378	0.628841	1.14186	0.276489
PPM1D	1.22826	0.846656	1.78187	0.278774
RIF1	1.24627	0.836162	1.85752	0.279606
PAXX	1.12698	0.90732	1.39981	0.279837
TIMM13	1.15816	0.887171	1.51193	0.280286
G3BP2	1.17558	0.875957	1.57769	0.281183
PIP5K1A	1.15062	0.890683	1.48643	0.282873
DIS3L2P1	0.723867	0.399957	1.3101	0.285699
AC040169.1	0.915608	0.778756	1.07651	0.285781
SIPA1L3	1.13699	0.897783	1.43993	0.286753
ZNF708	1.26008	0.822891	1.92953	0.287632
RFXANK	1.1388	0.894965	1.44906	0.290388
STIMATE	0.870312	0.67262	1.12611	0.290712
MSH5-SAPCD1	0.761094	0.458048	1.26464	0.292006
ABL1	1.16053	0.879792	1.53084	0.292069
WSB1	1.1435	0.890722	1.46802	0.292775
WDTC1	0.851968	0.63194	1.14861	0.293249
ANKRD10	1.14961	0.886159	1.4914	0.293768
RBMS1P1	1.5344	0.687304	3.42552	0.296093
AC092134.1	0.882002	0.696905	1.11626	0.296121
AKAP11	0.85661	0.639644	1.14717	0.298985
TSSC4	1.1715	0.868004	1.58111	0.300837
SMUG1	1.19965	0.848323	1.69649	0.303204
ZNF8	1.33243	0.771064	2.30248	0.303768
TET3	1.18368	0.857766	1.63344	0.30477
C19orf53	1.15842	0.873788	1.53578	0.306694
SERGEF	1.14106	0.885974	1.46959	0.306705
NOLC1	1.18448	0.856055	1.63892	0.306832
ZNF575	0.781069	0.485788	1.25583	0.307824
RBX1	1.18759	0.851912	1.65554	0.310408
UBR4	1.16989	0.863468	1.58506	0.311243
C16orf58	0.921604	0.786664	1.07969	0.312152
RPL38	1.12189	0.897227	1.4028	0.313085
ARHGAP32	0.84042	0.599407	1.17834	0.313336
CDC42SE1	1.14197	0.881223	1.47987	0.315456
SLC39A14	0.925366	0.794879	1.07727	0.317219
MELTF	1.07353	0.933926	1.23401	0.318154
LIG1	1.14373	0.878583	1.48888	0.318284
AC244669.1	1.10529	0.907842	1.34568	0.318748
AC008115.4	0.826093	0.567369	1.2028	0.318923
SPTBN1	0.884458	0.693549	1.12792	0.322324
TASOR	1.23658	0.811402	1.88456	0.323254
ZNF770	0.925981	0.794734	1.0789	0.324075
SMIM12	1.16279	0.859505	1.57308	0.328023
CCDC186	0.823014	0.556862	1.21637	0.32845
EML4	1.15949	0.861193	1.5611	0.329474
DCAF12	1.2056	0.827516	1.75643	0.330123
ETHE1	0.888141	0.699137	1.12824	0.331226
TMEM242	0.866763	0.648517	1.15846	0.333975
MFN2	0.878606	0.674777	1.144	0.336557
CHCHD5	0.873371	0.662537	1.1513	0.336808
PRPF39	1.20259	0.823706	1.75576	0.339334
ZFX	1.15105	0.862258	1.53658	0.33985
RTCA-AS1	0.902007	0.729818	1.11482	0.339955
LRRFIP1P1	1.25661	0.782108	2.019	0.345097
DTX2	1.17124	0.843277	1.62674	0.345685
AC108449.2	0.864936	0.639503	1.16984	0.346292
AC025449.1	1.1172	0.88706	1.40706	0.346353
CDK2AP1	1.13326	0.873374	1.47049	0.346567
CCDC14	1.1538	0.85543	1.55625	0.3487
SNF8	1.15705	0.851059	1.57305	0.351939
ENTPD3-AS1	0.89114	0.699065	1.13599	0.352095
AC012510.1	1.1004	0.89955	1.3461	0.352136
USF3	0.879523	0.670471	1.15376	0.353879
FAM107B	0.895045	0.707881	1.13169	0.354255
SUGT1	0.847627	0.596037	1.20541	0.357509
PSMA4	0.808357	0.513462	1.27262	0.358191
CCDC152	0.916654	0.761212	1.10384	0.358661
VEZT	1.16893	0.835956	1.63452	0.361518
SLC40A1	0.915793	0.757748	1.1068	0.362769
TRRAP	1.17708	0.827785	1.67377	0.364033
SETD5	1.17593	0.827263	1.67154	0.36645
PRKAR1A	0.888907	0.688182	1.14818	0.36715
SMG6	0.866526	0.634523	1.18336	0.367551
CSNK1A1	1.15642	0.842511	1.5873	0.36843
TMPO	1.11048	0.883293	1.3961	0.369544
RRP1	1.14456	0.851522	1.53844	0.370903
AC005912.1	1.06636	0.926346	1.22754	0.370966
FGD6	1.11749	0.875305	1.42668	0.372762
KAT6B	0.832369	0.553921	1.25079	0.377228
MRPL51	1.1576	0.835922	1.60308	0.378291
BICRAL	0.870108	0.638455	1.18581	0.378356
TBC1D8B	0.881113	0.663899	1.16939	0.380807
CRKL	1.14077	0.849324	1.53222	0.381588
NUDT18	0.90132	0.714043	1.13771	0.381972
SIX5	1.12373	0.864434	1.46081	0.383451
ZNF724	1.29111	0.722917	2.3059	0.387881
NCK1	1.14827	0.838232	1.57299	0.389222
UFSP1	0.910684	0.735954	1.1269	0.389356
KANK1	0.917363	0.753137	1.1174	0.391434
TMEM91	1.08867	0.895895	1.32292	0.392893
EIF4A2	1.10785	0.875188	1.40237	0.394458
SH3BP5	0.907609	0.726021	1.13461	0.394695
TRAPPC8	0.90056	0.706785	1.14746	0.396846
SUGP2	1.14541	0.835643	1.57001	0.398731
LINC01962	0.77163	0.421683	1.41199	0.4004
RBM43	0.86947	0.627158	1.2054	0.401374
STK16	0.861624	0.606251	1.22457	0.406308
SRSF11	1.11876	0.856782	1.46083	0.409708
SLC25A26	0.868222	0.620391	1.21506	0.409918
AC011477.3	0.72036	0.327555	1.58422	0.414652
AC023818.1	0.806167	0.48033	1.35304	0.414761
SLC35A3	0.917297	0.744366	1.1304	0.417984
RNASEH2C	1.09921	0.873898	1.3826	0.418964
WWC2	0.911233	0.726747	1.14255	0.420606
C12orf73	1.13997	0.828517	1.5685	0.42106
LRRC29	0.884081	0.654849	1.19356	0.421078
SRSF6	1.17246	0.79516	1.7288	0.421938
AC139530.1	1.10262	0.868646	1.39963	0.422097
AC244153.1	0.817043	0.498222	1.33989	0.423338
PREPL	1.1532	0.813338	1.63508	0.423615
PGP	1.08927	0.883282	1.34329	0.424002
HMGN1	1.11422	0.853684	1.45427	0.426109
SNX13	0.844799	0.55648	1.2825	0.428466
CTR9	0.899633	0.692399	1.16889	0.428499
PSMB3	1.12247	0.842835	1.49488	0.429348
MTM1	0.917105	0.739859	1.13681	0.429688
AP001816.1	0.918135	0.742706	1.135	0.429838
THOC6	1.12191	0.842492	1.49399	0.431199
ZNF687	1.1026	0.863596	1.40776	0.433309
MGAT2	0.915098	0.730937	1.14566	0.438997
PRMT7	0.875593	0.624326	1.22799	0.441383
PIK3CA	1.16786	0.785666	1.73599	0.442928
AC012640.4	0.922347	0.750145	1.13408	0.443295
DDX39B	0.922977	0.751795	1.13314	0.443803
CSRNP2	1.13549	0.81742	1.57733	0.448605
MRPS33	0.896009	0.674361	1.19051	0.44887
MTUS1	0.929515	0.767212	1.12615	0.455354
WRAP53	1.12137	0.829435	1.51605	0.45657
RPL36	1.08434	0.874406	1.34468	0.460805
PRR12	1.12464	0.82284	1.53713	0.461239
AC025181.2	0.912657	0.714857	1.16519	0.463371
TGOLN2	1.08933	0.866198	1.36995	0.464366
TIA1	1.11165	0.836614	1.4771	0.465481
PKD2	1.07703	0.88204	1.31513	0.466475
EFCAB14	1.12125	0.822856	1.52785	0.468492
AC239800.2	0.954062	0.83994	1.08369	0.469388
LAMP2	0.927747	0.756154	1.13828	0.47231
AC012464.1	0.799303	0.433431	1.47402	0.473121
LIG4	0.911988	0.708424	1.17405	0.47468
STARD4-AS1	0.861201	0.570664	1.29966	0.476669
RPP30	1.14459	0.787805	1.66297	0.478587
PYM1	1.16783	0.759823	1.79492	0.479275
MCMBP	1.14736	0.783618	1.67994	0.479818
NECAP1	0.884934	0.630418	1.2422	0.479885
CALD1	0.917147	0.721145	1.16642	0.480783
FNBP4	1.12948	0.803238	1.58822	0.483865
LINC02340	0.887672	0.635666	1.23958	0.48433
ZNF430	1.15498	0.770806	1.73062	0.484987
AC012181.2	0.893468	0.651065	1.22612	0.485448
TMED2	1.10726	0.831211	1.47499	0.486179
LINC01569	0.913849	0.708992	1.1779	0.486645
SGPL1	0.904605	0.681613	1.20055	0.487517
WDR11	0.891498	0.643454	1.23516	0.489948
MICAL3	0.911402	0.700058	1.18655	0.490694
ACER2	1.12471	0.805073	1.57124	0.490868
PCDHGC3	0.920767	0.726861	1.1664	0.493859
ZNF100	1.16519	0.751201	1.80733	0.494845
NPIPP1	1.0868	0.855756	1.38021	0.49488
RHOQP2	1.26575	0.640365	2.50189	0.497847
UFM1	0.899078	0.660957	1.22298	0.497967
AC074032.1	0.92184	0.726639	1.16948	0.50262
HIVEP2	0.895032	0.645638	1.24076	0.505756
SMAD1	0.933153	0.760704	1.1447	0.506907
AC022167.3	0.892379	0.637168	1.24981	0.507645
EEF2KMT	1.1154	0.806319	1.54295	0.509477
VPS4A	0.895227	0.64358	1.24527	0.510999
NNMT	0.977933	0.914949	1.04525	0.511205
XPC	0.91181	0.692212	1.20107	0.511364
PHF12	0.843413	0.507192	1.40252	0.511621
RNF123	0.928148	0.742627	1.16002	0.512241
PEX1	0.91522	0.701503	1.19405	0.513816
AC020558.1	0.910427	0.686906	1.20668	0.513835
RESF1	0.930221	0.748393	1.15623	0.514512
KPNA3	0.906366	0.672841	1.22094	0.517794
PFDN5	1.11283	0.801531	1.54504	0.523105
SOS1	1.1203	0.790084	1.58854	0.523748
TTC37	1.08529	0.83941	1.4032	0.532337
ADAMTSL4-AS1	0.768741	0.335914	1.75927	0.53353
EDF1	1.088	0.833908	1.41953	0.534249
LINC01881	0.889667	0.615332	1.28631	0.534276
AC007114.1	1.0678	0.868206	1.31328	0.534368
TFPT	1.08564	0.837444	1.4074	0.534958
CHMP1B	0.918532	0.700711	1.20406	0.538347
PNPLA8	0.915823	0.690405	1.21484	0.541884
SEMA4C	1.09038	0.825539	1.44018	0.542207
LENG9	0.941795	0.776531	1.14223	0.542434
AL035413.1	0.924477	0.717938	1.19043	0.542711
LAMTOR5-AS1	0.782462	0.354856	1.72534	0.54316
KLHL20	0.925466	0.719388	1.19058	0.54672
CRLF3	1.12801	0.762178	1.66943	0.547029
ANKRD17	1.08555	0.829389	1.42083	0.550005
LSM7	1.07861	0.841566	1.38242	0.550071
MYD88	0.921018	0.702706	1.20715	0.551141
TOPORS	0.906265	0.655082	1.25376	0.552284
EPB41L5	0.921626	0.704087	1.20638	0.552418
RPL23AP25	0.854673	0.505572	1.44483	0.557724
AC093752.3	0.90182	0.63685	1.27703	0.560419
ZEB1	1.09453	0.80604	1.48628	0.56283
POLR2I	1.0757	0.839346	1.37862	0.564289
AL122023.3	0.918388	0.683639	1.23375	0.57189
OSER1-DT	1.06009	0.865772	1.29801	0.572205
SMCHD1	1.10047	0.789062	1.53477	0.572703
PTENP1	0.822224	0.416416	1.6235	0.57281
TBC1D23	0.905554	0.641426	1.27845	0.57286
ANAPC11	1.07306	0.838805	1.37274	0.574693
JAK1	0.928724	0.715825	1.20494	0.577795
RSKR	1.16704	0.67686	2.01222	0.57837
MSH5	1.10066	0.777368	1.55841	0.588805
AC068234.2	0.917059	0.66875	1.25757	0.59097
WDFY3	1.08738	0.800778	1.47657	0.591485
RFC3	1.068	0.839763	1.35826	0.591761
SMC5	1.0936	0.787061	1.51954	0.59392
AC025754.2	0.928901	0.706867	1.22068	0.596675
ZNF787	1.08089	0.809039	1.44409	0.598697
ZNF710	0.942725	0.755342	1.17659	0.601915
TMEM184C	0.931988	0.713768	1.21692	0.604802
MIR4635	0.959471	0.820302	1.12225	0.604837
DYNC1LI2	1.0561	0.858725	1.29884	0.605102
AC009171.2	0.93816	0.736289	1.19538	0.605599
LY6G5B	1.1041	0.753639	1.61752	0.611267
MZT2A	1.05344	0.859694	1.29084	0.615644
MIR647	1.03923	0.893867	1.20823	0.616692
AC092123.1	0.915074	0.646071	1.29608	0.617278
ZNF48	1.095	0.766467	1.56434	0.618042
NFE2L2	1.06536	0.83062	1.36645	0.618075
MIR331	0.942683	0.747378	1.18903	0.618266
PNN	1.07868	0.800474	1.45359	0.618717
MED12	1.08048	0.795512	1.46754	0.620233
AC106820.3	1.05205	0.860713	1.28593	0.620274
NKTR	0.93098	0.701464	1.23559	0.620469
SKIL	1.06595	0.827282	1.37349	0.621403
LINC01137	1.05517	0.852589	1.3059	0.621476
UBL5	0.917927	0.652754	1.29082	0.622478
RAB18	1.10439	0.741297	1.64533	0.625424
MRPL14	1.06812	0.817623	1.39537	0.628882
TOGARAM1	0.903562	0.598762	1.36352	0.629069
WASHC4	0.924485	0.671219	1.27331	0.630727
PAFAH2	0.935886	0.713767	1.22712	0.631694
RRP1B	0.912415	0.625368	1.33122	0.634377
ADCY6	1.07155	0.80006	1.43518	0.642937
CLASP1	0.906329	0.597109	1.37568	0.644124
NDUFB11	1.06901	0.805378	1.41895	0.644148
BCL7C	1.05337	0.842813	1.31654	0.64767
AP000866.4	0.937452	0.710211	1.2374	0.64837
TRIR	0.924109	0.657428	1.29897	0.649602
EIF4G3	1.07408	0.787952	1.46411	0.651162
KBTBD3	0.905203	0.586199	1.39781	0.653242
ATXN1L	0.936572	0.702449	1.24873	0.655242
PIH1D1	1.07632	0.778571	1.48794	0.656223
AC020978.9	0.802069	0.300687	2.13948	0.659497
TSTD2	0.946885	0.742012	1.20832	0.660848
TMEM208	0.942658	0.722269	1.2303	0.663845
SPIN1	1.05299	0.834092	1.32933	0.664107
BABAM1	1.07588	0.769837	1.5036	0.668441
ZFYVE9	1.07726	0.765471	1.51603	0.669472
ROCK2	1.06715	0.789771	1.44194	0.672164
UBE2D3-AS1	1.07172	0.777384	1.47751	0.672424
UBE3C	0.944588	0.723639	1.233	0.674984
SERINC3	0.927458	0.644772	1.33408	0.684746
NOSIP	1.05471	0.812742	1.36872	0.688718
NCOR2	1.0683	0.772679	1.47703	0.689353
SEC24D	0.959905	0.784996	1.17379	0.690104
EGLN2	0.955068	0.761815	1.19734	0.69022
MBD6	0.934813	0.670983	1.30238	0.690315
AL390728.4	1.03498	0.872548	1.22766	0.693014
SRPRA	0.948461	0.725292	1.2403	0.699057
ZNF664	1.05518	0.80359	1.38554	0.699126
STX16	1.07869	0.734335	1.58454	0.699425
KIAA1109	0.94642	0.715509	1.25185	0.699571
L2HGDH	0.947521	0.7191	1.2485	0.701705
EMC3	1.0684	0.761081	1.4998	0.702233
TNFRSF18	1.0316	0.879497	1.21	0.702288
RPL36A	1.03411	0.87034	1.22869	0.702998
KCTD18	0.94278	0.6962	1.27669	0.703282
RPS28	0.955672	0.755867	1.20829	0.704775
FAM122B	1.05529	0.798045	1.39545	0.705812
AC008735.2	1.04079	0.844179	1.28319	0.708221
TMEM53	0.95446	0.746676	1.22007	0.70983
MIER1	0.933113	0.647527	1.34465	0.710362
ZSCAN25	0.90425	0.530751	1.54059	0.711202
PMS2P10	0.941906	0.684389	1.29632	0.713404
SLC25A53	0.912711	0.558763	1.49087	0.715246
BMPR2	0.949225	0.714067	1.26183	0.719764
KIF16B	0.945574	0.695426	1.2857	0.721112
MACF1	0.938563	0.661365	1.33194	0.722574
WDR25	0.943889	0.683895	1.30272	0.725384
PPP1R35	1.04667	0.810397	1.35182	0.72677
TNRC18	1.05659	0.775444	1.43965	0.727298
CISD3	0.954685	0.735363	1.23942	0.727675
CATIP-AS1	0.960909	0.766007	1.2054	0.730272
CEPT1	0.955151	0.73463	1.24187	0.731894
CRYBG3	1.0532	0.782472	1.41759	0.732437
TMEM106B	1.05321	0.780856	1.42056	0.734165
AC106795.1	1.03897	0.83197	1.29747	0.735952
PMF1	1.0417	0.820822	1.32201	0.736866
TARBP1	1.03896	0.830984	1.29898	0.737367
PAAF1	0.936594	0.636652	1.37785	0.739445
KMT2C	0.949581	0.699882	1.28837	0.73964
CEP192	1.05685	0.760529	1.46862	0.741894
NFAT5	1.04488	0.801367	1.36239	0.745714
DUS2	1.04894	0.782134	1.40677	0.749663
AL139035.1	1.07941	0.673688	1.72948	0.750699
LINC02609	1.03144	0.852066	1.24858	0.750793
ESYT2	0.951696	0.700189	1.29354	0.75186
SAMD8	0.936518	0.622931	1.40797	0.752556
NCOA4	0.965716	0.776251	1.20143	0.754225
NOTCH1	1.03928	0.816287	1.32318	0.75455
RNU6-850P	1.02666	0.870136	1.21134	0.75522
POGZ	1.04584	0.787486	1.38894	0.756874
PPCDC	0.958537	0.73252	1.25429	0.757594
AC135048.1	1.04216	0.79936	1.3587	0.760272
SNTB2	1.06792	0.699061	1.6314	0.761165
DENND5B	0.95374	0.702505	1.29482	0.761409
NOMO3	0.952725	0.687386	1.32049	0.77122
LSM8	1.03978	0.79818	1.35451	0.772474
CEP290	1.06365	0.6994	1.61759	0.772988
SP1	1.06288	0.701457	1.61053	0.773643
LINC00265	0.926742	0.550808	1.55926	0.77442
SMAD5	0.961028	0.725807	1.27248	0.781362
HNRNPDL	1.05013	0.742169	1.48588	0.782383
DENND4C	1.0348	0.810426	1.32129	0.783851
DIDO1	1.06109	0.694071	1.62219	0.784242
ZNF445	0.945432	0.632118	1.41404	0.7847
ROMO1	1.03226	0.821639	1.29687	0.785102
RANGRF	1.02337	0.865292	1.21033	0.787267
AC073332.1	1.03951	0.777788	1.38929	0.793461
METTL15P1	0.955303	0.677012	1.34799	0.794654
SRP54	1.04297	0.757253	1.43649	0.796724
MAU2	0.948672	0.627692	1.43379	0.802547
PDS5A	1.04706	0.72826	1.50541	0.803957
PIK3R2	1.03459	0.788635	1.35726	0.806029
ARL2BP	0.973469	0.782936	1.21037	0.808815
MED18	1.04641	0.724257	1.51187	0.809053
RBM39	1.04888	0.71096	1.54742	0.809903
ZCCHC8	0.952601	0.63902	1.42006	0.811589
ANO6	1.02982	0.807634	1.31313	0.812688
MED27	1.03666	0.765502	1.40388	0.815967
REV3L	0.961316	0.683997	1.35107	0.820273
PLSCR4	0.980807	0.829493	1.15972	0.820673
ORAI3	0.97404	0.77452	1.22496	0.822045
ATP5F1E	1.03005	0.792457	1.33888	0.824858
FAM120A	1.0459	0.700147	1.56241	0.826511
AP003352.1	1.02504	0.820129	1.28116	0.827927
AL133353.1	0.978019	0.79833	1.19815	0.830088
TMEM170A	0.960536	0.655997	1.40645	0.836054
UQCC2	0.976457	0.778814	1.22426	0.836422
AC011445.2	0.986257	0.864166	1.1256	0.837392
ESCO1	1.04343	0.694959	1.56664	0.837544
ZNRD1	0.973934	0.754349	1.25744	0.839432
MIR570	0.982914	0.831791	1.16149	0.839661
AP000254.1	0.979824	0.804257	1.19372	0.839666
SBF2	1.03162	0.760451	1.39949	0.841414
H2AC20	1.01785	0.853821	1.2134	0.843552
GTF2I	0.982048	0.819711	1.17653	0.844217
SLC35F5	1.03348	0.743294	1.43696	0.844741
KLHL28	1.03949	0.705086	1.53249	0.844952
RAB43	1.02854	0.774205	1.36643	0.846041
AC007191.1	0.965028	0.668801	1.39246	0.849088
AC091153.3	1.02394	0.797184	1.31518	0.853073
LSM14A	1.03735	0.701407	1.53419	0.854293
AC096996.2	0.978851	0.778774	1.23033	0.85462
CEMIP2	1.01914	0.830486	1.25064	0.855982
OTUD4	0.975343	0.744585	1.27762	0.856167
PTOV1	0.971638	0.711706	1.32651	0.856261
ZNF567	0.956758	0.589972	1.55157	0.857778
ZBTB38	1.0189	0.829266	1.2519	0.858573
ZNF579	0.980232	0.785122	1.22383	0.86005
ZBTB33	1.02044	0.810991	1.28399	0.862932
AC008267.5	1.01468	0.842517	1.22203	0.8779
PNISR	1.0215	0.776742	1.3434	0.879001
HHLA3	1.01412	0.844397	1.21796	0.880706
AKAP17A	0.97419	0.690381	1.37467	0.881692
PLEKHM3	1.0314	0.686355	1.54991	0.881717
BRD1	1.02411	0.74776	1.40259	0.881973
POLK	1.02411	0.734231	1.42843	0.888418
LINC00884	0.980255	0.739842	1.29879	0.889521
AC008906.1	0.969142	0.602742	1.55827	0.897078
TIMM50	1.01955	0.739422	1.40581	0.90596
C1orf50	1.01708	0.76686	1.34895	0.906418
CHD8	0.973998	0.611483	1.55143	0.911677
CTDSPL2	0.977531	0.647299	1.47624	0.913956
TAB2	1.01322	0.796196	1.28939	0.914976
RAB11FIP2	0.986375	0.737598	1.31906	0.92629
CPSF7	0.98281	0.678802	1.42297	0.926834
HIVEP1	0.98711	0.748179	1.30234	0.926893
RNASET2	1.00993	0.815765	1.2503	0.927751
GADD45GIP1	0.989921	0.79408	1.23406	0.928232
PAXBP1	0.983749	0.66042	1.46537	0.93577
STAM2	0.983759	0.659996	1.46634	0.935914
PIK3R4	0.988749	0.739588	1.32185	0.939117
RPP21	1.00798	0.785166	1.29403	0.950261
COX6B1	1.00677	0.805787	1.25788	0.952653
SEC23A	0.992629	0.77134	1.2774	0.954153
GTF2A1	0.990511	0.706262	1.38916	0.95594
AASDHPPT	0.990636	0.705927	1.39017	0.9566
TTC9	0.996613	0.877853	1.13144	0.958201
USP25	1.00802	0.740285	1.37257	0.959574
AC004241.2	0.993332	0.765307	1.2893	0.959896
PTPRG	1.00618	0.790308	1.28101	0.960146
ARMT1	1.00531	0.805144	1.25525	0.962688
SLC22A18AS	0.997099	0.874862	1.13642	0.965276
SNHG25	0.997022	0.860976	1.15457	0.968218
RCBTB1	0.995815	0.788396	1.2578	0.971929
AC026403.1	0.997917	0.882258	1.12874	0.973536
ZNF587	1.006	0.698172	1.44954	0.974404
GOLGA4	0.99638	0.776441	1.27862	0.977266
DNAJC24	1.00503	0.654591	1.54307	0.981709
RPS15A	1.00304	0.763508	1.31771	0.982619
SERINC1	0.99773	0.807685	1.23249	0.983182
AC127024.4	0.996019	0.657707	1.50835	0.984968
PYURF	0.997726	0.77968	1.27675	0.985566
CNTRL	0.996901	0.701736	1.41622	0.986174
C12orf57	0.998264	0.80216	1.24231	0.98758
DNAJB14	0.997155	0.668537	1.4873	0.988858
ATP6V1A	0.99794	0.695264	1.43238	0.991076
EXOC3-AS1	1.00113	0.813552	1.23195	0.991513
SCRN3	0.998418	0.72099	1.3826	0.992396
MSL1	0.998151	0.676127	1.47355	0.992569
RAB43P1	0.999124	0.792807	1.25913	0.994073
AC012065.3	0.999872	0.901318	1.1092	0.998067
DDX17	0.99973	0.750466	1.33179	0.998528
